# Supplementary material for: Reduced graphene oxides: the thinnest and most lightweight materials with highly efficient microwave attenuation performances of the carbon world
Source: Royal Society of Chemistry journal article supplement (doi:10.1039/c3nr06717c), 2014-01-01
Supplement: c3nr06717c1.pdf [file c3nr06717c1.pdf]

Manuscript ID: NR-ART-12-2013-006717.R1

## Reduced Graphene Oxides: The Thinnest and Most Lightweight Material with High-efficient Microwave Attenuation Performances around Carbon World

Submit to **Nanoscale**

### Supplementary Information

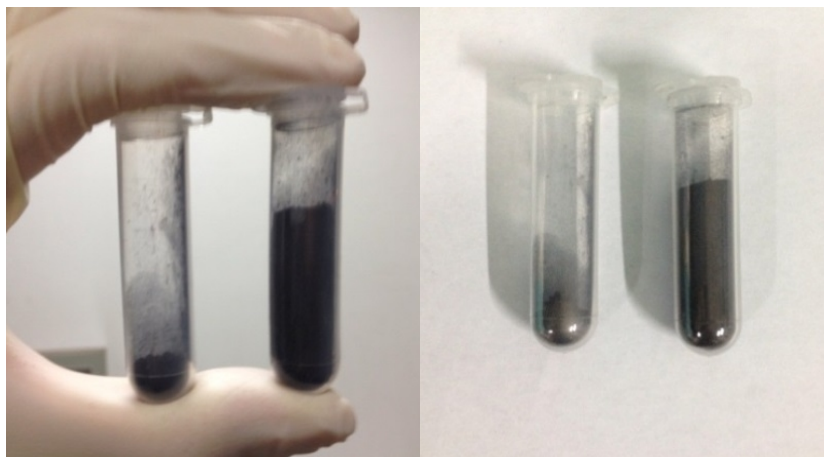

Figure S1. Powders of the GN and r-GO with the same weight, where the volume of the r-GOs is  $\sim 8$  time larger than that of the GNs, indicating the much smaller tap density of the r-GOs.

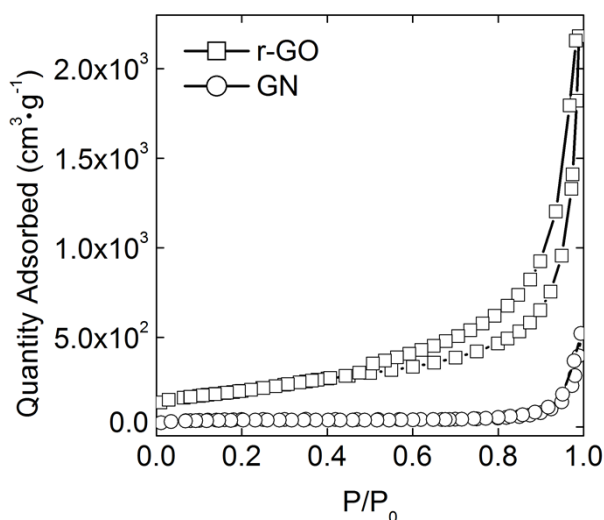

Figure S2. BET adsorption-desorption curves of the r-GO and GN.

Table S1 Specific surface area of the r-GO and GN.

| Sample | Single point surface area<br>$\text{m}^2/\text{g}$ | BET Surface Area<br>$\text{m}^2/\text{g}$ |
|--------|----------------------------------------------------|-------------------------------------------|
| r-GO   | 707.3297                                           | 717.4939                                  |
| GN     | 132.198                                            | 133.51                                    |

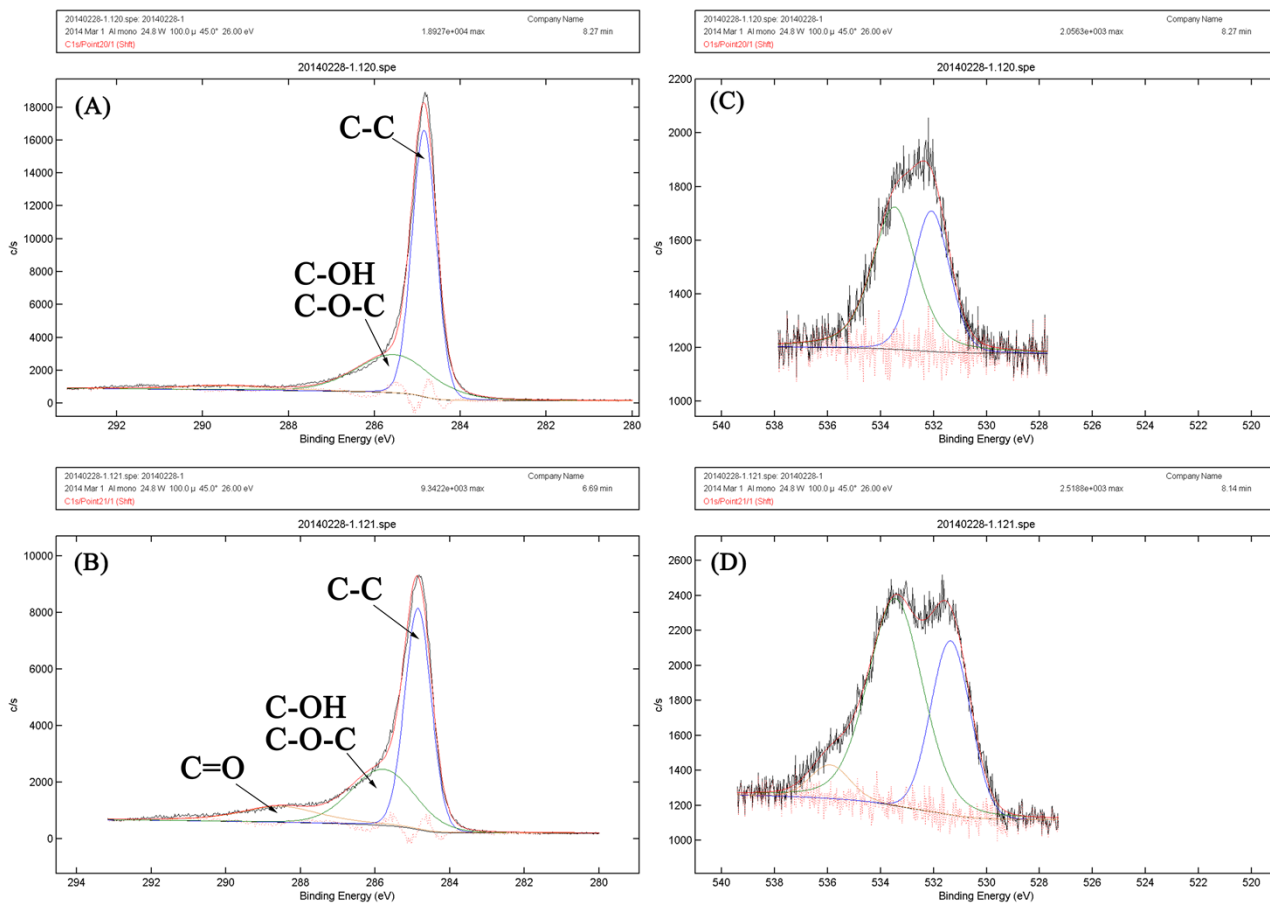

Figure S3. C1s XPS of (A) GN and (B) r-GO. O1s XPS of (C) GN and (D) r-GO.

Table S2. Chemical composition (atomic %) of the GN and r-GO

| Sample | C    | O    | C/O   |
|--------|------|------|-------|
| GN     | 95.7 | 4.3  | 22.26 |
| r-GO   | 84.3 | 13.7 | 6.15  |
